# Supplementary material for: Giant modulation of optical nonlinearity by Floquet engineering
Source: Springer Nature journal article supplement (doi:10.1038/s41586-021-04051-8), 2021-12-08
Supplement: MOESM5 [file 41586_2021_4051_MOESM5_ESM.xlsx]

## Sheet: panel a
φ (rad)	-280 fs	-70 fs	0 fs	70 fs	280 fs
0.021268	0.340509	0.21645	0.167811	0.207068	0.264625
0.125988	0.274321	0.197826	0.155776	0.236881	0.277022
0.230708	0.243727	0.207387	0.113473	0.16266	0.242315
0.335427	0.144335	0.119691	0.0685517	0.118283	0.15196
0.440147	0.126025	0.0518081	0.0126428	0.0915836	0.132539
0.544867	0.204594	0.0588646	0.00859169	0.0807204	0.201847
0.649587	0.29354	0.10959	0.0465462	0.149306	0.30076
0.754306	0.482477	0.198534	0.0923971	0.212203	0.55953
0.859026	0.622689	0.302143	0.162205	0.314264	0.719271
0.963746	0.791026	0.42522	0.223255	0.424161	0.836148
1.06847	0.831028	0.524617	0.291677	0.469056	0.902732
1.17	0.773196	0.487813	0.24237	0.433883	0.74277
1.27472	0.649071	0.331917	0.15392	0.365434	0.627767
1.37944	0.406047	0.237455	0.104945	0.254801	0.395482
1.48416	0.204006	0.146523	0.0685388	0.174004	0.28538
1.58888	0.214562	0.133811	0.0417707	0.100484	0.148579
1.6936	0.328076	0.25278	0.101481	0.191227	0.250633
1.79832	0.444306	0.26857	0.125912	0.277431	0.452434
1.90304	0.642206	0.404514	0.231491	0.379771	0.664578
2.00776	0.803167	0.477648	0.271671	0.4186	0.809801
2.11248	0.884926	0.487795	0.299104	0.476631	0.830826
2.2172	0.77988	0.465888	0.226381	0.407914	0.745377
2.32192	0.530315	0.341601	0.202706	0.324542	0.557417
2.42664	0.374258	0.245125	0.126152	0.198327	0.393225
2.53136	0.248799	0.150593	0.06481	0.15738	0.221484
2.63608	0.0477149	0.0339442	8.64898e-05	0.050692	0.0695237
2.7408	0.00254102	0.0058898	0.0168211	0.0058898	0.00254102
2.84552	0.0768681	0.0684365	0.036415	0.080023	0.065762
2.95024	0.190173	0.132195	0.0842427	0.150254	0.178793
3.05496	0.253149	0.179124	0.136573	0.21564	0.284342
3.15968	0.334272	0.22322	0.166444	0.204504	0.251496
3.2644	0.267346	0.179242	0.148543	0.215479	0.28599
3.36911	0.217373	0.171466	0.0901752	0.151521	0.233654
3.47383	0.156061	0.104798	0.0639959	0.111465	0.141697
3.57855	0.110836	0.0408342	0.0037159	0.0678593	0.15262
3.68327	0.228725	0.0545291	0.00594808	0.0726039	0.25147
3.78799	0.35184	0.0976463	0.0536002	0.129828	0.374253
3.89271	0.524261	0.185002	0.100762	0.203165	0.655137
3.99743	0.68369	0.283305	0.157869	0.289565	0.797342
4.10215	0.841567	0.392361	0.214105	0.397429	0.898246
4.20687	0.850485	0.460946	0.264062	0.428051	0.925111
4.31159	0.801869	0.447218	0.247689	0.397865	0.787152
4.41631	0.602495	0.289645	0.148975	0.313528	0.601295
4.52103	0.367005	0.181387	0.100942	0.196947	0.34781
4.62575	0.156365	0.109296	0.0612218	0.126267	0.230164
4.73047	0.188222	0.0896173	0.0251385	0.064014	0.109715
4.83519	0.254304	0.191883	0.0692618	0.162031	0.200295
4.93991	0.358517	0.217759	0.109991	0.221626	0.373091
5.04463	0.562831	0.319274	0.209227	0.302173	0.554424
5.14935	0.692436	0.409434	0.23688	0.368282	0.703945
5.25407	0.742862	0.414858	0.259345	0.400523	0.727016
5.35879	0.668335	0.393371	0.194279	0.362659	0.644521
5.46351	0.477153	0.299386	0.181693	0.289508	0.501332
5.56823	0.343852	0.222102	0.120562	0.179578	0.368565
5.67295	0.261347	0.162883	0.0689173	0.178557	0.249418
5.77767	0.0504038	0.0527547	0.00159027	0.068057	0.0754696
5.88239	0.00442742	0.010914	0.0203312	0.0138034	0.0154309
5.98711	0.0801459	0.0716969	0.0433733	0.0806245	0.0812475
6.09183	0.193509	0.129781	0.0881974	0.153369	0.180107
6.19655	0.269619	0.189107	0.1351	0.213644	0.298719

## Sheet: panel b
t (fs)	0.66 eV	0.66 eV error bar		t (fs)	0.99 eV	0.99 eV error bar		t (fs)	1.30 eV	1.30 eV error bar		t (fs)	1.55 eV	1.55 eV error bar
-310	-0.549049	6.98078		-300	-1.16478	6.95923		-300	-2.99413	6.89421		-300	-4.09022	6.86205
-300	0.891042	7.03119		-286	2.21621	7.07757		-294	4.70999	7.16642		-294	-2.282	6.92303
-290	-5.8492	6.79528		-272	1.53139	7.0536		-288	-8.71975	6.6919		-288	1.07379	7.03622
-280	-1.04764	6.96333		-258	0.42933	7.01503		-282	3.75062	7.13252		-282	0.844971	7.0285
-270	6.47396	7.22659		-244	-3.3598	6.88241		-276	3.13492	7.11077		-276	4.33012	7.14604
-260	4.20452	7.14716		-230	-2.07041	6.92754		-270	2.21924	7.07841		-270	-7.45671	6.74851
-250	2.40164	7.08406		-216	1.38452	7.04846		-264	-1.74967	6.93818		-264	-3.04897	6.89717
-240	-7.44078	6.73957		-202	-4.27413	6.85041		-258	-4.29085	6.84839		-258	-0.333057	6.98877
-230	-0.478055	6.98327		-188	-9.36916	6.67208		-252	0.0651736	7.0023		-252	1.96162	7.06616
-220	7.88182	7.27586		-174	-7.90519	6.72332		-246	-3.06403	6.89174		-246	6.8189	7.22998
-210	0.462501	7.01619		-160	-12.6926	6.55576		-240	8.5003	7.30034		-240	8.32606	7.28082
-200	-1.75324	6.93864		-146	-17.2009	6.39797		-234	3.76545	7.13305		-234	4.11274	7.13871
-190	2.64853	7.0927		-132	-19.7454	6.30891		-228	10.4978	7.37092		-228	-6.34986	6.78584
-180	-10.2598	6.64091		-118	-27.615	6.03347		-222	12.1355	7.42879		-222	-5.95255	6.79924
-170	-3.31588	6.88394		-104	-38.4373	5.65469		-216	-3.91623	6.86163		-216	-9.08104	6.69372
-160	-6.22847	6.782		-90	-44.9241	5.42766		-210	17.2527	7.6096		-210	6.67253	7.22505
-150	-9.4205	6.67028		-76	-55.6327	5.05286		-204	1.54977	7.05476		-204	-3.62491	6.87774
-140	-14.3766	6.49682		-62	-67.0243	4.65415		-198	-7.4088	6.73822		-198	2.46834	7.08325
-130	-20.4895	6.28287		-48	-72.0826	4.47711		-192	-4.26376	6.84935		-192	2.66348	7.08983
-120	-22.6494	6.20727		-34	-80.8606	4.16988		-186	-2.07775	6.92659		-186	-8.12674	6.72591
-110	-29.8391	5.95563		-20	-81.3731	4.15194		-180	-10.4654	6.63022		-180	-8.54371	6.71184
-100	-37.3879	5.69142		-6	-86.8476	3.96033		-174	2.26131	7.0799		-174	-7.26224	6.75506
-90	-44.4456	5.4444		8	-84.5481	4.04081		-168	-6.34288	6.77589		-168	1.56762	7.05287
-80	-53.0185	5.14435		22	-74.7855	4.38251		-162	-11.9107	6.57915		-162	-14.386	6.5148
-70	-52.2548	5.17108		36	-71.8389	4.48564		-156	-8.16339	6.71156		-156	-4.70932	6.84117
-60	-58.5372	4.9512		50	-67.6647	4.63174		-150	7.27124	7.25692		-150	-17.397	6.41325
-50	-70.109	4.54618		64	-61.1777	4.85878		-144	-19.7239	6.30309		-144	-10.982	6.62961
-40	-76.866	4.30969		78	-52.9161	5.14794		-138	-5.42742	6.80823		-138	-17.6404	6.40504
-30	-82.0159	4.12944		92	-39.6033	5.61389		-132	-14.9321	6.4724		-132	-18.8099	6.36559
-20	-90.8669	3.81966		106	-26.0771	6.0873		-126	-19.9681	6.29446		-126	-25.7203	6.13252
-10	-89.9936	3.85022		120	-17.0739	6.40241		-120	-28.1509	6.00533		-120	-31.0895	5.95144
0	-89.4577	3.86898		134	-16.8959	6.40864		-114	-21.7323	6.23212		-114	-28.7308	6.03099
10	-87.6747	3.93138		148	-6.90266	6.75841		-108	-19.6831	6.30453		-108	-39.266	5.67567
20	-84.6115	4.0386		162	-9.4356	6.66975		-102	-38.0299	5.65628		-102	-29.2644	6.01299
30	-77.7304	4.27944		176	8.55852	7.29955		-96	-43.4733	5.46394		-96	-49.9443	5.31552
40	-74.1925	4.40326		190	8.56385	7.29973		-90	-41.0565	5.54934		-90	-39.1497	5.67959
50	-80.8697	4.16956		204	5.71971	7.20019		-84	-37.8468	5.66275		-84	-38.2293	5.71063
60	-65.0458	4.7234		218	3.8187	7.13365		-78	-47.3942	5.3254		-78	-47.0726	5.41237
70	-60.8789	4.86924		232	10.3585	7.36255		-72	-57.4822	4.96896		-72	-53.5928	5.19246
80	-50.4058	5.2358		246	-2.08402	6.92706		-66	-69.6084	4.5405		-66	-66.02	4.77333
90	-45.6329	5.40285		260	10.7003	7.37451		-60	-66.371	4.65489		-60	-56.8805	5.08158
100	-40.1018	5.59644		274	3.48507	7.12198		-54	-65.5485	4.68395		-54	-68.7288	4.68197
110	-29.2493	5.97627		288	6.45743	7.22601		-48	-69.1316	4.55735		-48	-63.0559	4.8733
120	-19.2259	6.32709		302	6.43366	7.22518		-42	-63.9843	4.73922		-42	-81.4293	4.25361
130	-15.512	6.45708		316	7.42271	7.2598		-36	-78.6528	4.22093		-36	-83.6674	4.17813
140	-8.81009	6.69165		330	5.25725	7.184		-30	-83.1204	4.06308		-30	-82.0853	4.23149
150	-5.99884	6.79004		344	11.1962	7.39187		-24	-87.102	3.92239		-24	-93.5274	3.84558
160	4.01726	7.1406		358	6.99427	7.2448		-18	-74.1445	4.38023		-18	-91.0687	3.9285
170	-0.530112	6.98145		372	6.18043	7.21631		-12	-78.3219	4.23263		-12	-100.27	3.61818
180	0.767833	7.02687		386	2.22882	7.07801		-6	-77.1215	4.27504		-6	-95.6995	3.77232
190	-3.9113	6.8631		400	6.56205	7.22967		0	-86.6767	3.93742		0	-87.6618	4.04341
200	-1.21709	6.9574						6	-90.1885	3.81334		6	-92.2265	3.88945
210	5.03835	7.17634						12	-80.7897	4.14543		12	-81.947	4.23615
220	7.99067	7.27967						18	-78.9891	4.20905		18	-80.9074	4.27121
230	2.21308	7.07746						24	-84.7199	4.00656		24	-91.4261	3.91645
240	3.11947							30	-77.6071	4.25788		30	-70.9756	4.60619
250	3.66945							36	-75.9001	4.3182		36	-61.5881	4.9228
260	5.15709							42	-59.1976	4.90835		42	-65.1607	4.80231
270	0.695248							48	-61.6727	4.8209		48	-68.9499	4.67451
280	-1.53233							54	-61.7819	4.81704		54	-58.7561	5.01832
290	5.21308							60	-56.5458	5.00205		60	-60.8559	4.9475
								66	-64.3773	4.72534		66	-54.7403	5.15376
								72	-50.1398	5.22839		72	-58.6176	5.02299
								78	-48.2959	5.29355		78	-67.4716	4.72437
								84	-51.8058	5.16953		84	-38.7161	5.69421
								90	-52.3279	5.15108		90	-41.0911	5.61411
								96	-32.8054	5.84087		96	-51.6094	5.25935
								102	-45.9591	5.37611		102	-47.0103	5.41447
								108	-27.3447	6.03382		108	-36.6191	5.76494
								114	-33.095	5.83064		114	-21.9407	6.26
								120	-18.9816	6.32932		120	-13.5599	6.54266
								126	-24.7717	6.12473		126	-13.9849	6.52833
								132	-19.8723	6.29784		132	-10.5369	6.64462
								138	-2.00359	6.92921		138	-14.0627	6.52571
								144	-9.76397	6.65501		144	-11.5017	6.61208
								150	-17.2662	6.38993		150	2.35376	7.07939
								156	-7.61789	6.73083		156	-20.668	6.30293
								162	1.38157	7.04882		162	-0.47446	6.984
								168	-3.23876	6.88556		168	-11.9141	6.59817
								174	-5.51923	6.80499		174	-6.44505	6.78263
								180	-10.8065	6.61817		180	-2.11649	6.92862
								186	-1.22801	6.95661		186	0.226496	7.00764
								192	8.37661	7.29597		192	-13.316	6.55089
								198	-2.73818	6.90325		198	-1.02976	6.96527
								204	-2.6143	6.90763		204	1.23807	7.04176
								210	1.93051	7.06821		210	-7.94081	6.73218
								216	0.425643	7.01504		216	5.33075	7.17979
								222	5.89428	7.20826		222	8.75792	7.29538
								228	5.60595	7.19808		228	4.55921	7.15377
								234	1.05093	7.03713		234	-5.19122	6.82491
								240	0.418001	7.01477		240	1.42391	7.04802
								246	11.7775	7.41614		246	6.88967	7.23237
								252	-3.77885	6.86648		252	-0.151238	6.9949
								258	10.4046	7.36763		258	-4.50084	6.8482
								264	6.1814	7.21841		264	8.38721	7.28288
								270	5.22508	7.18462		270	11.0706	7.37338
								276	-2.02351	6.9285		276	-0.934201	6.96849
								282	13.282	7.4693		282	3.6827	7.12421
								288	-0.35021	6.98763		288	-4.90648	6.83452
								294	15.3138	7.54109		294	2.1435	7.07229
								300	-5.31041	6.81237		300	17.0831	7.57617

## Sheet: panel c
φ (rad)	-90 ps	2 ps	30 ps	90 ps	160 ps
0.021268	0.317384	0.356254	0.321549	0.161754	0.16272
0.125988	0.283856	0.357265	0.338495	0.165029	0.144787
0.230708	0.252013	0.27359	0.247296	0.130853	0.0968657
0.335427	0.157743	0.0949515	0.0923789	0.0519637	0.0545418
0.440147	0.119045	0.0284616	0.0423249	0.0153015	0.0168705
0.544867	0.150712	0.0515196	0.0171251	0.0347324	0.0115021
0.649587	0.240398	0.133336	0.0570893	0.0792498	0.0293465
0.754306	0.378529	0.252579	0.13955	0.146057	0.0641065
0.859026	0.565861	0.466244	0.264221	0.249853	0.113181
0.963746	0.73251	0.491559	0.350343	0.253282	0.162049
1.06847	0.796652	0.588057	0.408875	0.29898	0.18335
1.17	0.724277	0.577598	0.320049	0.216912	0.144679
1.27472	0.630559	0.469577	0.263072	0.175278	0.113268
1.37944	0.384479	0.310761	0.150246	0.114838	0.0591497
1.48416	0.24833	0.166784	0.0788485	0.0607539	0.0296053
1.58888	0.214888	0.176298	0.0532947	0.0668087	0.0191605
1.6936	0.261275	0.191784	0.0807368	0.0771757	0.0489588
1.79832	0.459683	0.363528	0.167882	0.147117	0.0719712
1.90304	0.560686	0.489121	0.262518	0.197214	0.119569
2.00776	0.784556	0.640197	0.350692	0.255709	0.152569
2.11248	0.858862	0.711621	0.385534	0.282657	0.168941
2.2172	0.751648	0.636651	0.352635	0.290128	0.160851
2.32192	0.539279	0.474344	0.2645	0.209773	0.10469
2.42664	0.31239	0.284159	0.145881	0.132468	0.070857
2.53136	0.232221	0.112474	0.0566805	0.0560564	0.0432025
2.63608	0.048155	0.0272664	0.000844131	0.0221174	8.46617e-05
2.7408	0.00254102	0.0105296	0.0174314	0.00659343	0.0198346
2.84552	0.0848955	0.137181	0.0836258	0.0667583	0.0542849
2.95024	0.237046	0.222833	0.181465	0.0989602	0.0934121
3.05496	0.304453	0.367105	0.282297	0.164992	0.134938
3.15968	0.315011	0.347581	0.316846	0.146776	0.18138
3.2644	0.29608	0.329804	0.305763	0.141206	0.158049
3.36911	0.228532	0.230954	0.238641	0.103	0.0939113
3.47383	0.152017	0.0932222	0.0790487	0.0427837	0.0452832
3.57855	0.101217	0.0369587	0.0281119	0.0138083	0.0184925
3.68327	0.153153	0.0531919	0.0104961	0.0267691	0.0105481
3.78799	0.230744	0.131173	0.0588315	0.065178	0.028584
3.89271	0.387245	0.232837	0.13443	0.11932	0.0671518
3.99743	0.562363	0.463659	0.253683	0.215073	0.107428
4.10215	0.728887	0.484215	0.334689	0.222276	0.149996
4.20687	0.800509	0.594864	0.392017	0.263983	0.170249
4.31159	0.753406	0.590409	0.328535	0.211683	0.154357
4.41631	0.555859	0.446954	0.267668	0.159641	0.116137
4.52103	0.333608	0.269389	0.154028	0.0951228	0.0547675
4.62575	0.178212	0.12653	0.0725965	0.0433996	0.0256009
4.73047	0.145914	0.11696	0.0389212	0.0423917	0.0117276
4.83519	0.195916	0.137467	0.0569372	0.0548552	0.0405239
4.93991	0.379271	0.286987	0.137373	0.115111	0.06294
5.04463	0.48992	0.42377	0.225371	0.167915	0.107951
5.14935	0.66918	0.559604	0.309382	0.219545	0.150595
5.25407	0.716086	0.607651	0.344358	0.238056	0.155208
5.35879	0.640663	0.542955	0.319446	0.276632	0.165871
5.46351	0.480901	0.399086	0.258083	0.19519	0.105518
5.56823	0.279953	0.247324	0.14138	0.133176	0.0830886
5.67295	0.270938	0.0993206	0.0570082	0.0605525	0.0553206
5.77767	0.0488283	0.0272079	0.00505514	0.030278	0.000821108
5.88239	0.0101378	0.00988823	0.0214326	0.00763553	0.0156354
5.98711	0.0753132	0.165072	0.0957176	0.0857907	0.0484382
6.09183	0.21918	0.232849	0.193239	0.111232	0.085323
6.19655	0.303136	0.414211	0.308557	0.19979	0.13427

## Sheet: panel d
t (ps)	dI^mag/I^mag (%)	error bar
-99.2	1.53946	7.05388
-89.2	-2.8222	6.90122
-79.2	0.646675	7.02263
-69.2	1.43568	7.05025
-59.2	1.75861	7.06155
-49.2	1.20332	7.04212
-39.2	-0.646745	6.97736
-29.2	1.7511	7.06129
-19.2	0.674162	7.0236
-9.2	-2.46992	6.91355
0.501	-0.190201	6.99334
0.8345	-13.0288	6.54399
1.168	-27.1987	6.04804
2.8355	-38.1353	5.66527
3.169	-43.4609	5.47887
3.5025	-48.311	5.30911
4.503	-55.3484	5.0628
11.84	-57.0603	5.00289
18.51	-76.5558	4.32055
25.18	-68.3772	4.6068
31.85	-83.0227	4.09421
38.52	-76.746	4.31389
45.19	-72.0861	4.47699
51.86	-82.8325	4.10086
58.53	-76.1754	4.33386
65.2	-84.259	4.05094
71.87	-86.7316	3.96439
78.54	-81.3109	4.15412
85.21	-88.5385	3.90115
91.88	-89.5846	3.86454
98.55	-93.1033	3.74138
105.22	-90.3454	3.83791
111.89	-86.8267	3.96107
118.56	-99.5701	3.51504
125.23	-92.0572	3.778
131.9	-90.6307	3.82793
138.57	-91.5817	3.79464
145.24	-93.8641	3.71476
151.91	-93.9592	3.71143
158.58	-95.0053	3.67481
165.25	-96.8122	3.61157
171.92	-96.3367	3.62821
178.59	-94.9102	3.67814
185.26	-96.3367	3.62821
191.93	-93.769	3.71808
198.6	-98.7142	3.545
231.95	-94.8151	3.68147
265.3	-98.524	3.55166
298.65	-100.426	3.48509
332	-102.613	3.40853
365.35	-99.0946	3.53169
398.7	-100.249	3.49128
432.05	-97.4637	3.58877
465.4	-98.7142	3.545
498.75	-99.5026	3.51741
532.1	-97.1793	3.59872

## Sheet: panel e
2hw (eV)	I^mag (a.u.)	error bar
2.95238	0.113063	0.0221097
2.97006	0.115159	0.0223483
2.98795	0.125409	0.0234973
3.00606	0.137683	0.0248392
3.02439	0.179927	0.0292391
3.04294	0.304	0.0410593
3.06173	0.625291	0.0689447
3.08075	0.869668	0.089282
3.1	1.1435	0.111737
3.1195	1.54256	0.14416
3.13924	1.74194	0.160283
3.15924	2.42844	0.215604
3.17949	2.76613	0.242749
3.2	3.07788	0.267786
3.22078	3.2375	0.280599
3.24183	3.69406	0.317228
3.26316	3.96312	0.338804

## Sheet: panel f
2hw (eV)	I^mag (a.u.)	error bar
3.06173	0.158824	0.0270778
3.08075	0.245246	0.0356065
3.1	0.327041	0.0431493
3.1195	0.370215	0.0470101
3.13924	0.466839	0.0554566
3.15924	0.835383	0.0864506
3.17949	1.43839	0.135718
3.2	1.54509	0.144365
3.22078	2.0979	0.188997
3.24183	2.43808	0.21638
3.26316	2.71078	0.238302

## Sheet: panel g
2hw (eV)	I^mag (a.u.)	error bar
3.06173	0.0812878	0.018301
3.08075	0.0713128	0.017008
3.1	0.118924	0.0227737
3.1195	0.123405	0.0232749
3.13924	0.243871	0.0354763
3.15924	0.339981	0.0443136
3.17949	0.403854	0.049977
3.2	0.566329	0.0639644
3.22078	0.666925	0.0724402
3.24183	0.820082	0.0851852
3.26316	1.4188	0.13413
